# Supplementary material for: Effects of the low carbohydrate, high fat diet on glycemic control and body weight in patients with type 2 diabetes: experience from a community-based cohort
Source: PubMed Central journal article supplement (PMC7103851; doi:10.1136/bmjdrc-2019-000980), 2020-03-18
Supplement: bmjdrc-2019-000980supp001.pdf [file bmjdrc-2019-000980supp001.pdf]

### Appendix 1. Study flowchart describing identification and selection process of patients for LCHF and UC groups.

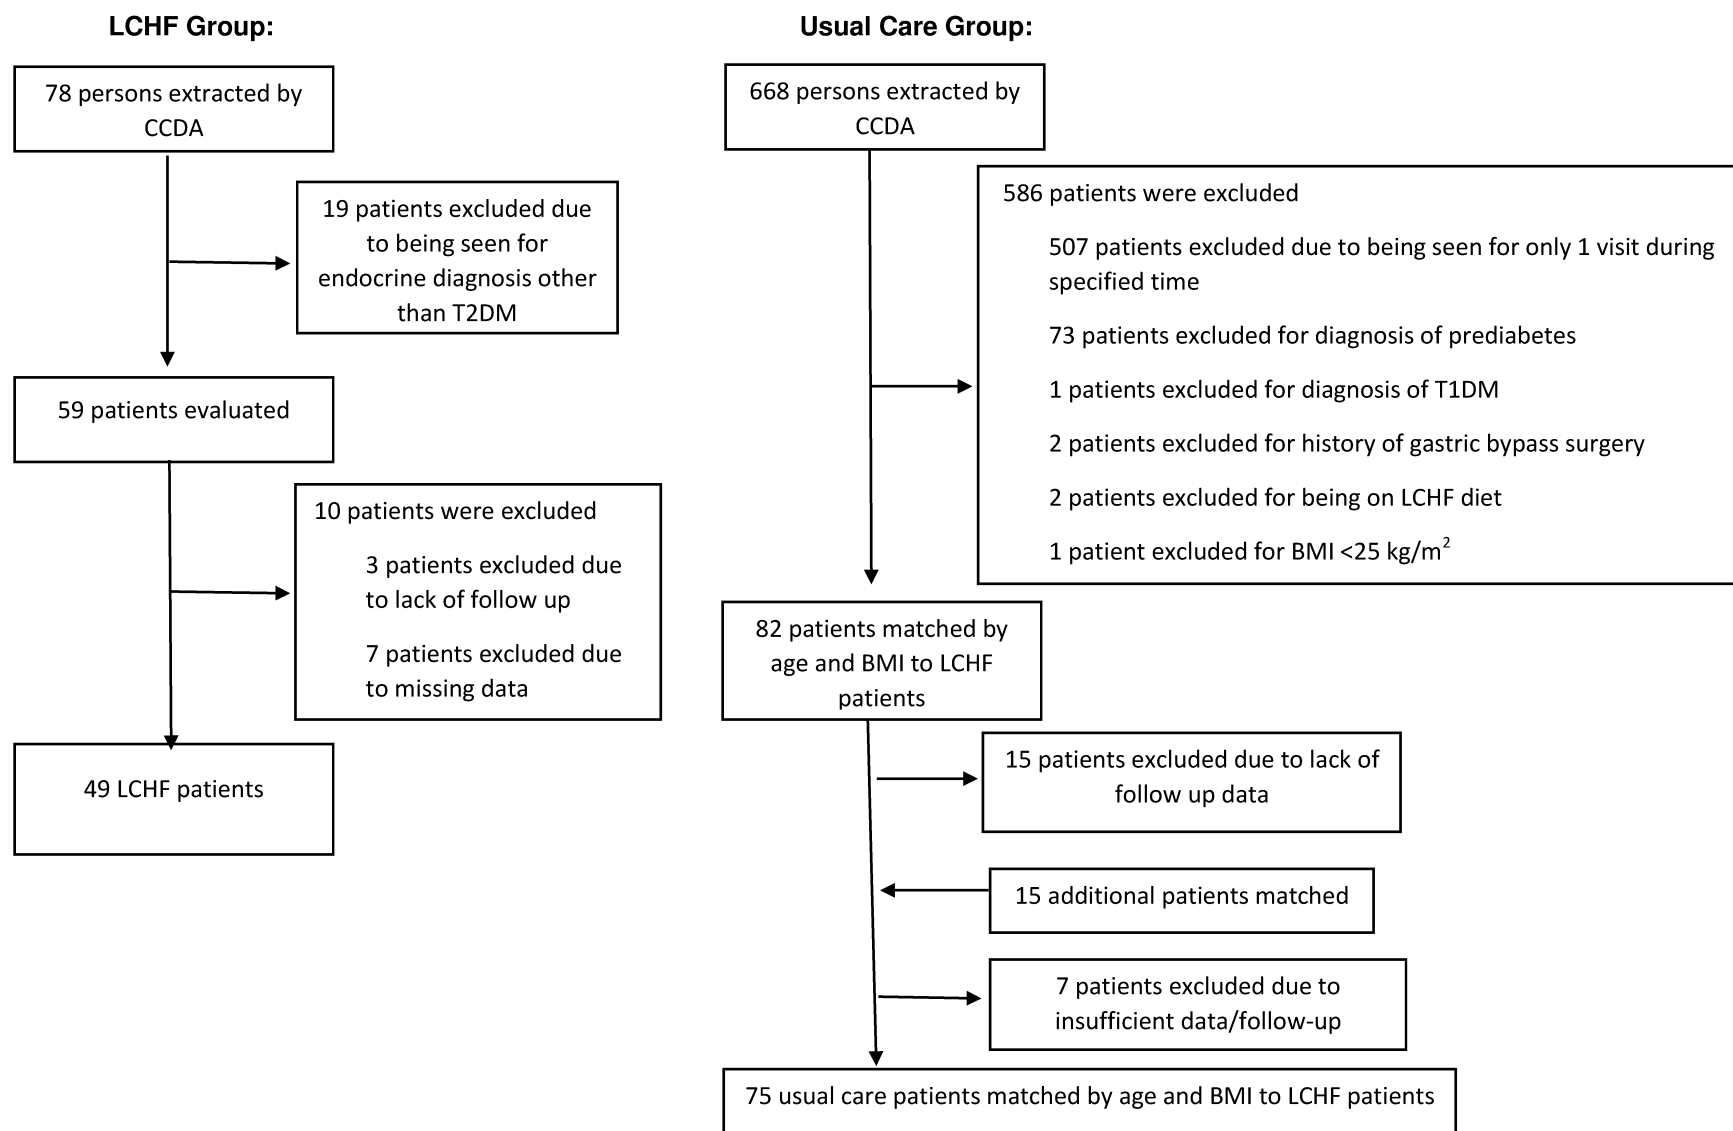

**Appendix Figure 1.** Study flowchart describing identification and selection process of patients for LCHF and UC groups.  
Abbreviations: T2DM: type 2 diabetes mellitus; T1DM: type 1 diabetes mellitus; BMI: body mass index; LCHF: low carbohydrate, high fat , UC: Usual Care
